# Supplementary material for: Elevated Maternal Folate Status and Changes in Maternal Prolactin, Placental Lactogen and Placental Growth Hormone Following Folic Acid Food Fortification: Evidence from Two Prospective Pregnancy Cohorts
Source: MDPI journal article supplement (doi:10.3390/nu15071553), 2023-03-23
Supplement: s1 [file s1]

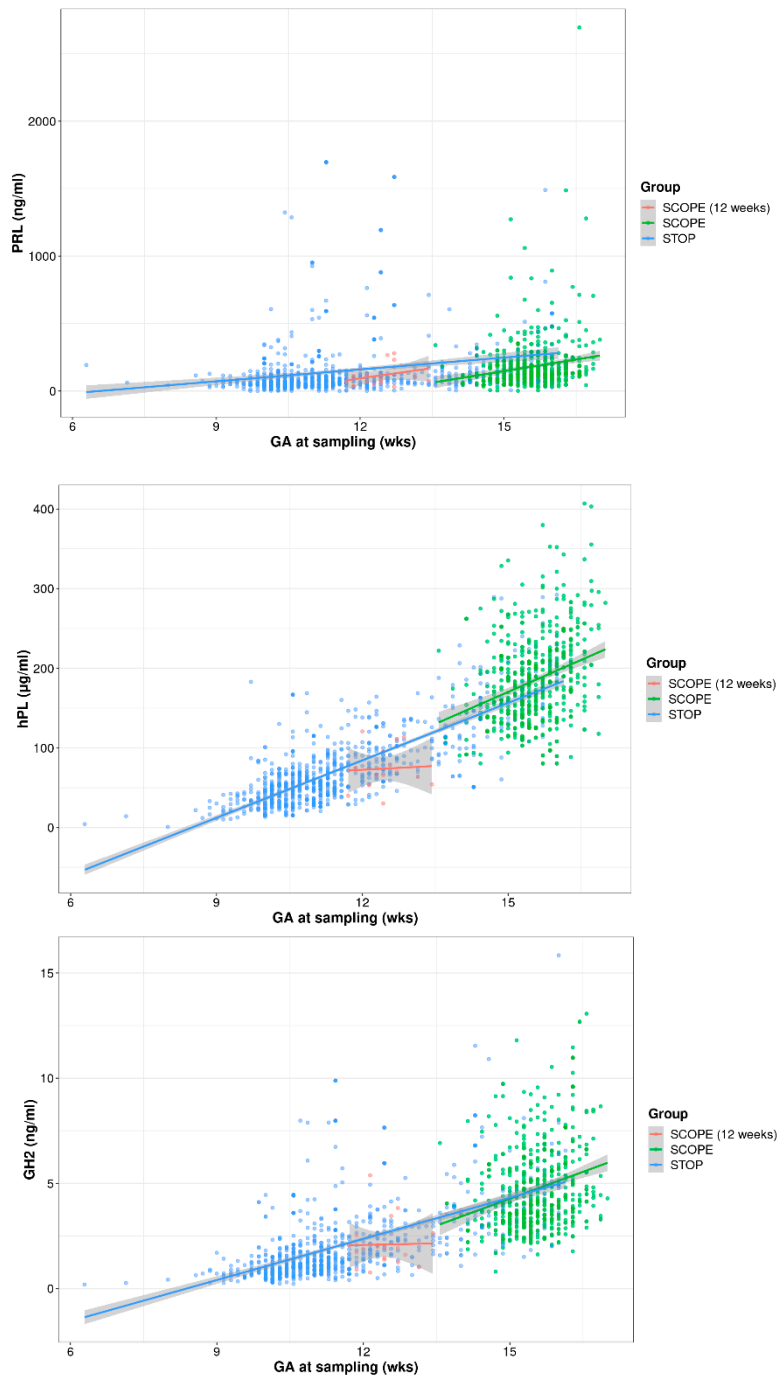

**Supplementary Figure S1. Gestational modelling of pregnancy hormones:** Serum hormone (PRL, hPL and GH2) concentrations across gestation in SCOPE and STOP women with uncomplicated pregnancies. SCOPE samples (N=22) collected at both 11-13 and 14-16 weeks' were used to estimate hormone changes across early gestation using linear mixed effects models. GA: gestational age.
